# Supplementary material
Source: PubMed Central journal article supplement (PMC6325222)
Supplement: a31a2a04c224a29b1b8e032949e4f407_AAC.01811-18-s0001.pdf [file a31a2a04c224a29b1b8e032949e4f407_AAC.01811-18-s0001.pdf]

**Table S1. GenBank accession numbers, *ERG11* and *FKSI* genotypes, and clade information of representative strains included in this study**

| Strain/isolate   | Clade          | <i>ERG11</i>  |                         | <i>FKSI</i>   |          |
|------------------|----------------|---------------|-------------------------|---------------|----------|
|                  |                | Accession no. | Genotype                | Accession no. | Genotype |
| Reference        | South Asian    | XM_018315289  | WT                      | XM_018312389  | WT       |
| CBS 10913        | East Asian     | MK059959      | WT                      | MK059967      | WT       |
| VPCI 1132/P/13   | South Asian    | MK059960      | Y132F                   | MK059973      | WT       |
| VPCI 1133/P/13-R |                | MK059961      | K143R                   | MK059974      | S639F    |
| D26413           | South American | MK059962      | K177R/N335S/E343D/Y501H | MK059970      | WT       |
| C48374           |                | MK059963      | Y132F/K177R/N335S/E343D | MK059971      | WT       |
| C54019           |                | MK059964      | K143R/K177R/N335S/E343D | MK059972      | WT       |
| 2324866          |                | MK059965      | K177R/N335S/E343D       | MK059968      | WT       |
| A106871          |                | MK059966      | K177R/N335S/E343D/I466M | MK059969      | WT       |
